# Supplementary material for: Long-term plankton and environmental monitoring dataset from the Marine Protected Area of the Iroise Marine Natural Park (2010–2023) in the Iroise Sea, North Atlantic
Source: Copernicus journal article supplement (doi:10.5194/essd-2025-207), 2025-04-28
Supplement: Supplementary file 1 [file PNMI data paper supplementary files - Reviewed.pdf › Supplement/PNMI data paper supplementary files - Reviewed.pdf]

# Long-term plankton and environmental monitoring dataset from the Marine Protected Area of the Iroise Marine Natural Park (2010-2023) in the Iroise Sea, North Atlantic.

Laetitia Drago<sup>1</sup>, Caroline Cailliau<sup>2</sup>, Patrick Pouline<sup>2</sup>, Beatriz Beker<sup>3</sup>, Laëtitia Jalabert<sup>4</sup>, Jean-Baptiste Romagnan<sup>5</sup>, Sakina-Dorothee Ayata<sup>1,6</sup>

<sup>1</sup>Sorbonne Université, MNHN, CNRS, IRD, Laboratoire d'Océanographie et du Climat : Expérimentations et Approches Numériques, LOCEAN, F-75005 Paris, France

<sup>2</sup>Parc naturel marin d'Iroise, Office Français de la Biodiversité, Le Conquet, France

<sup>3</sup>Laboratoire des Sciences de l'Environnement MARin (LEMAR), UMR 6539, Université de Bretagne Occidentale, Plouzané, France

<sup>4</sup>Sorbonne Université, CNRS, Institut de la Mer de Villefranche, IMEV, F-06230, Villefranche-sur-Mer, France

<sup>5</sup>DECOD, L'Institut Agro, IFREMER, INRAE, 44000, Nantes, France

<sup>6</sup>Institut Universitaire de France, F-75005 Paris, France

*Correspondence to:* Laetitia Drago ([laetitia.drago@locean.ipsl.fr](mailto:laetitia.drago@locean.ipsl.fr)) and Sakina-Dorothee Ayata ([sakina-dorothee.ayata@locean.ipsl.fr](mailto:sakina-dorothee.ayata@locean.ipsl.fr))

**Supplementary Table 1: Time coverage of the available zooplankton data.** Colored cells signify that there was a sampling done this month. Green signifies that the classification was checked a second time by Laëtitia Jalabert. The first sheet called “Transect sampling plan” contains the sampling plan for the transects B and D. The second sheet called “Coastal stations sampling plan” contains the sampling plan for the stations Douarnenez (D1), Molene and Sein. See document Supplementary\_Table\_1.xlsx

**Supplementary Table 2: Time coverage of the available phytoplankton data.** The first sheet called “Transect sampling plan” contains the sampling plan for the transects B and D. The second sheet called “Coastal stations sampling plan” contains the sampling plan for the stations Douarnenez (D1), Molene and Sein. See document Supplementary\_Table\_2.xlsx

**Supplementary Table 3: Time coverage of the available biological and environmental data**

| Data type     | Zone       | Time coverage                |
|---------------|------------|------------------------------|
| Phytoplankton | Douarnenez | January 2013 - December 2018 |
|               | Sein       | April 2012 - November 2020   |
|               | Molène     | May 2011 - November 2017     |

|                                                                                    |            |                               |
|------------------------------------------------------------------------------------|------------|-------------------------------|
|                                                                                    | Transects  | October 2010 - September 2020 |
| Zooplankton                                                                        | Douarnenez | 2011, 2013-2021               |
|                                                                                    | Molène     | 2011 - 2013                   |
|                                                                                    | Transects  | 2010 - 2022                   |
| Environmental (surface and bottom temperature and salinity)                        |            | 2010-2013, 2015-2023          |
| Environmental (profiles of temperature, salinity, turbidity, oxygen, fluorescence) |            | 2016, 2018-2023               |

30 **Supplementary Table 4: Names and associated ID number of all the Ecotaxa projects**

| Ecotaxa ID | Name of the project                           | Link to project                                                                                 |
|------------|-----------------------------------------------|-------------------------------------------------------------------------------------------------|
| 436        | Zooscan AMP pnmir WP2 200 2010                | <a href="https://ecotaxa.obs-vlfr.fr/gui/prj/436">https://ecotaxa.obs-vlfr.fr/gui/prj/436</a>   |
| 434        | Zooscan AMP WP2 200 2013 2015 sn001           | <a href="https://ecotaxa.obs-vlfr.fr/gui/prj/434">https://ecotaxa.obs-vlfr.fr/gui/prj/434</a>   |
| 435        | Zooscan AMP WP2 200 2013 2015 sn033           | <a href="https://ecotaxa.obs-vlfr.fr/gui/prj/435">https://ecotaxa.obs-vlfr.fr/gui/prj/435</a>   |
| 442        | Zooscan AMP WP2 200 2010 2011                 | <a href="https://ecotaxa.obs-vlfr.fr/gui/prj/442">https://ecotaxa.obs-vlfr.fr/gui/prj/442</a>   |
| 443        | Zooscan AMP WP2 200 2011 2012                 | <a href="https://ecotaxa.obs-vlfr.fr/gui/prj/443">https://ecotaxa.obs-vlfr.fr/gui/prj/443</a>   |
| 468        | Zooscan AMP pnmir WP2 200 2011 2012 2013 2014 | <a href="https://ecotaxa.obs-vlfr.fr/gui/prj/468">https://ecotaxa.obs-vlfr.fr/gui/prj/468</a>   |
| 826        | Zooscan AMP pnmir WP2 200 2016                | <a href="https://ecotaxa.obs-vlfr.fr/gui/prj/826">https://ecotaxa.obs-vlfr.fr/gui/prj/826</a>   |
| 1140       | Zooscan AMP Douarnenez WP2 200 2015 2016 2017 | <a href="https://ecotaxa.obs-vlfr.fr/gui/prj/1140">https://ecotaxa.obs-vlfr.fr/gui/prj/1140</a> |
| 1244       | Zooscan AMP pnmir WP2 200 2017                | <a href="https://ecotaxa.obs-vlfr.fr/gui/prj/1244">https://ecotaxa.obs-vlfr.fr/gui/prj/1244</a> |
| 3847       | Zooscan AMP pnmir WP2 200 2018                | <a href="https://ecotaxa.obs-vlfr.fr/gui/prj/3847">https://ecotaxa.obs-vlfr.fr/gui/prj/3847</a> |
| 3848       | Zooscan AMP pnmir WP2 200 2019                | <a href="https://ecotaxa.obs-vlfr.fr/gui/prj/3848">https://ecotaxa.obs-vlfr.fr/gui/prj/3848</a> |
| 3849       | Zooscan AMP pnmir WP2 200 2020                | <a href="https://ecotaxa.obs-vlfr.fr/gui/prj/3849">https://ecotaxa.obs-vlfr.fr/gui/prj/3849</a> |
| 5759       | Zooscan AMP pnmir WP2 200 2021                | <a href="https://ecotaxa.obs-vlfr.fr/gui/prj/5759">https://ecotaxa.obs-vlfr.fr/gui/prj/5759</a> |
| 6448       | Zooscan AMP pnmir WP2 200 2022                | <a href="https://ecotaxa.obs-vlfr.fr/gui/prj/6448">https://ecotaxa.obs-vlfr.fr/gui/prj/6448</a> |

|       |                                               |                                                                                                   |
|-------|-----------------------------------------------|---------------------------------------------------------------------------------------------------|
| 8055  | Zooscan AMP Douarnenez WP2 200 2011           | <a href="https://ecotaxa.obs-vlfr.fr/gui/prj/8055">https://ecotaxa.obs-vlfr.fr/gui/prj/8055</a>   |
| 9297  | Zooscan AMP Douarnenez WP2 200 2021           | <a href="https://ecotaxa.obs-vlfr.fr/gui/prj/9297">https://ecotaxa.obs-vlfr.fr/gui/prj/9297</a>   |
| 9318  | Zooscan AMP Douarnenez WP2 200 2018 2019 2020 | <a href="https://ecotaxa.obs-vlfr.fr/gui/prj/9318">https://ecotaxa.obs-vlfr.fr/gui/prj/9318</a>   |
| 11128 | Zooscan AMP pnmir WP2 200 2023                | <a href="https://ecotaxa.obs-vlfr.fr/gui/prj/11128">https://ecotaxa.obs-vlfr.fr/gui/prj/11128</a> |
