# Supplementary material for: Long-term plankton and environmental monitoring dataset from the Marine Protected Area of the Iroise Marine Natural Park (2010–2023) in the Iroise Sea, North Atlantic
Source: Copernicus journal article supplement (doi:10.5194/essd-2025-207), 2025-04-28
Supplement: Supplementary file 1 [file Supplementary_Table_1.xlsx]

## Sheet: Transects sampling plan
Transects sampling plan
Orange: The taxonomic classification is not homogeneous between years and projects.
Green: The taxonomic classification is homogeneous between years and projects.
Tansect B	B1				B2				B3				B4				B5				B6				B7
	End Winter	Spring	Summer	Fall	End Winter	Spring	Summer	Fall	End Winter	Spring	Summer	Fall	End Winter	Spring	Summer	Fall	End Winter	Spring	Summer	Fall	End Winter	Spring	Summer	Fall	End Winter	Spring	Summer	Fall
2010				25/10				25/10				25/10				25/10				25/10
2011		02/05	05/07	11/10		02/05	05/07	11/10		02/05	05/07	11/10		03/05	05/07	11/10		03/05	04/07	11/10		02/05	04/07	12/10		02/05	04/07	12/10
2012		02/05	10/07			02/05	10/07			02/05	10/07			02/05				02/05				02/05				02/05
2013		03/06	02/07	03/10		03/06	02/07	03/10		03/06	02/07	01/10		04/06	02/07	01/10		04/06	02/07	01/10		04/06	02/07	01/10		04/06
2015		28/04	10/07	07/10		28/04	10/07	07/10		28/04	09/07	08/10		28/04	09/07	08/10		28/04	09/07	09/10			09/07	09/10			09/07	09/10
2016			07/07	06/09			07/07	06/09			06/07	06/09			06/07	06/09			06/07	06/09			06/07	06/09			06/07	06/09
2017	06/04	30/05	12/07	26/10	06/04	30/05	12/07	26/10	06/04	30/05	12/07	26/10	06/04	29/05	12/07	26/10	06/04	29/05	13/07	26/10	06/04	29/05	13/07	26/10	06/04	29/05	13/07	26/10
2018	10/04	24/05	04/07	13/09	10/04	24/05	05/07	13/09	11/04	24/05	05/07	13/09	11/04	24/05	05/07	13/09	11/04	24/05	05/07	13/09	11/04	24/05	05/07	13/09	11/04	24/05	05/07	13/09
2019	10/04	22/05	11/07	24/10	10/04	22/05	11/07	24/10	09/04	22/05	11/07	24/10	09/04	22/05	11/07	23/10	09/04	22/05	11/07	23/10	09/04	22/05	11/07	23/10	09/04	22/05	11/07	23/10
2020		18/05	07/07	21/09		18/05	07/07	21/09		18/05	07/07	21/09		19/05	08/07	21/09		19/05	08/07	21/09		19/05	08/07	21/09		19/05	08/07
2021	24/03	01/06	02/07	11/10	23/03	01/06	02/07	11/10	22/03	31/05	01/07	12/10	22/03	31/05	01/07	12/10	22/03	31/05	01/07	12/10	22/03	31/05	01/07	12/10	22/03	31/05	01/07	12/10
2022	25/03	05/05	05/07	03/10	25/03	05/05	05/07	03/10	24/03	04/05	04/07	03/10	24/03	04/05	04/07	03/10	24/03	04/05	04/07	03/10	24/03	04/05	05/07	03/10	24/03	04/05	05/07	03/10
2023	26/04	07/06	06/07	09/10	26/04	07/06	06/07	09/10	26/04	07/06	06/07	09/10	26/04	07/06	06/07	09/10	26/04	07/06	06/07	09/10	26/04	07/06	06/07	09/10	26/04	07/06	06/07	09/10
Transect D	D1				D2				D3				D4				D5				D6
	End Winter	Spring	Summer	Fall	End Winter	Spring	Summer	Fall	End Winter	Spring	Summer	Fall	End Winter	Spring	Summer	Fall	End Winter	Spring	Summer	Fall	End Winter	Spring	Summer	Fall
2010
2011		25/05	12/07	14/10		25/05	12/07	14/10		25/05	12/07	14/10		25/05	12/07	14/10		05/05	12/07	14/10		05/05	12/07	14/10
2012		03/05				03/05				03/05				03/05				03/05				03/05
2013		15/05	05/07			15/05	04/07	07/10		15/05	04/07	07/10		15/05	04/07	07/10		15/05	04/07			15/05	04/07
2015			10/07	07/10			10/07	07/10			10/07	08/10			09/07	08/10			09/07	08/10			09/07	08/10
2016		25/04	07/07	07/09		25/04	07/07	07/09		25/04	07/07	07/09		22/04	07/07	07/09		22/04	06/07	07/09		22/04	06/07	07/09
2017	07/04	31/05	12/07	27/10	07/04	31/05	12/07	27/10	07/04	31/05	12/07	27/10	07/04	30/05	13/07	27/10	07/04	30/05	13/07	27/10	07/04	30/05	13/07	27/10
2018	11/04	22/05	04/07	14/09	11/04	22/05	04/07	14/09	10/04	22/05	04/07	14/09	10/04	22/05	04/07	14/09	10/04	22/05	04/07	14/09	10/04	22/05	04/07	14/09
2019	01/04	23/05	11/07	22/10	01/04	23/05	11/07	22/10	01/04	23/05	11/07	22/10	01/04	23/05	11/07	22/10	01/04	23/05	11/07	22/10	01/04	23/05	11/07	22/10
2020		20/05	07/07	23/09		20/05	07/07	22/09		20/05	07/07	22/09		20/05	07/07	22/09		20/05	07/07	22/09		20/05	07/07	22/09
2021	22/03	30/05	02/07	12/10	22/03	30/05	02/07	12/10	22/03	30/05	02/07	12/10	22/03	30/05	02/07	12/10	22/03	30/05	02/07	12/10	22/03	30/05	02/07	12/10
2022	23/03	04/05	04/07	04/10	23/03	04/05	04/07	04/10	24/03	04/05	04/07	04/10	24/03	05/05	05/07	04/10	24/03	05/05	05/07	03/10	24/03	05/05	05/07	03/10
2023	25/04	06/06	06/07	09/10	25/04	06/06	06/07	09/10	25/04	06/06	06/07	09/10	25/04	06/06	06/07	09/10	25/04	06/06	06/07	09/10	25/04	06/06	06/07	09/10

## Sheet: Coastal stations sampling plan
Station	Date (DD/MM/YYYY)	Season
DOUARNENEZ	2011-04-12	spring		Orange: The taxonomic classification is not homogeneous between years and projects.
DOUARNENEZ	2011-04-27	spring		Green: The taxonomic classification is homogeneous between years and projects.
DOUARNENEZ	2011-05-10	spring
DOUARNENEZ	2011-05-24	spring
DOUARNENEZ	2011-06-10	summer
DOUARNENEZ	2011-06-24	summer
DOUARNENEZ	2011-07-11	summer
DOUARNENEZ	2011-07-25	summer
DOUARNENEZ	2011-08-11	summer
DOUARNENEZ	2011-08-22	summer
DOUARNENEZ	2011-09-21	fall
DOUARNENEZ	2011-10-20	fall
DOUARNENEZ	2013-01-07	winter
DOUARNENEZ	2013-01-23	winter
DOUARNENEZ	2013-03-19	spring
DOUARNENEZ	2013-04-03	spring
DOUARNENEZ	2013-04-19	spring
DOUARNENEZ	2013-05-02	spring
DOUARNENEZ	2013-06-03	summer
DOUARNENEZ	2013-06-18	summer
DOUARNENEZ	2013-06-29	summer
DOUARNENEZ	2013-07-17	summer
DOUARNENEZ	2013-07-31	summer
DOUARNENEZ	2013-08-13	summer
DOUARNENEZ	2013-09-12	fall
DOUARNENEZ	2013-09-30	fall
DOUARNENEZ	2013-10-15	fall
DOUARNENEZ	2013-10-30	fall
DOUARNENEZ	2013-11-08	fall
DOUARNENEZ	2013-11-25	fall
DOUARNENEZ	2013-12-10	winter
DOUARNENEZ	2015-01-27	winter
DOUARNENEZ	2015-03-13	spring
DOUARNENEZ	2015-04-13	spring
DOUARNENEZ	2015-05-12	spring
DOUARNENEZ	2015-06-12	summer
DOUARNENEZ	2015-08-10	summer
DOUARNENEZ	2015-09-07	fall
DOUARNENEZ	2015-11-03	fall
DOUARNENEZ	2016-01-18	winter
DOUARNENEZ	2016-02-18	winter
DOUARNENEZ	2016-03-17	spring
DOUARNENEZ	2016-05-13	spring
DOUARNENEZ	2016-06-13	summer
DOUARNENEZ	2016-08-10	summer
DOUARNENEZ	2016-10-24	fall
DOUARNENEZ	2016-11-22	fall
DOUARNENEZ	2016-12-22	winter
DOUARNENEZ	2017-01-24	winter
DOUARNENEZ	2017-02-20	winter
DOUARNENEZ	2017-03-24	spring
DOUARNENEZ	2017-05-02	spring
DOUARNENEZ	2017-06-19	summer
DOUARNENEZ	2017-08-01	summer
DOUARNENEZ	2017-09-27	fall
DOUARNENEZ	2017-12-26	winter
DOUARNENEZ	2018-01-09	winter
DOUARNENEZ	2018-02-08	winter
DOUARNENEZ	2018-03-08	spring
DOUARNENEZ	2018-06-05	summer
DOUARNENEZ	2018-08-06	summer
DOUARNENEZ	2018-09-05	fall
DOUARNENEZ	2018-10-01	fall
DOUARNENEZ	2018-10-31	fall
DOUARNENEZ	2018-11-30	fall
DOUARNENEZ	2019-01-16	winter
DOUARNENEZ	2019-02-15	winter
DOUARNENEZ	2019-04-29	spring
DOUARNENEZ	2019-06-26	summer
DOUARNENEZ	2019-08-12	summer
DOUARNENEZ	2019-11-19	fall
DOUARNENEZ	2019-12-17	winter
DOUARNENEZ	2020-01-21	winter
DOUARNENEZ	2020-06-29	summer
DOUARNENEZ	2020-08-12	summer
DOUARNENEZ	2020-09-14	fall
DOUARNENEZ	2020-10-13	fall
DOUARNENEZ	2020-11-09	fall
DOUARNENEZ	2020-12-08	winter
DOUARNENEZ	2021-01-06	winter
DOUARNENEZ	2021-02-05	winter
DOUARNENEZ	2021-03-05	spring
DOUARNENEZ	2021-04-06	spring
DOUARNENEZ	2021-04-19	spring
DOUARNENEZ	2021-05-18	spring
DOUARNENEZ	2021-06-18	summer
DOUARNENEZ	2021-07-16	summer
DOUARNENEZ	2021-08-04	summer
DOUARNENEZ	2021-08-16	summer
DOUARNENEZ	2021-09-14	fall
DOUARNENEZ	2021-11-16	fall
DOUARNENEZ	2021-12-13	winter
MOLENE	2010-05-06	spring
MOLENE	2010-06-08	summer
MOLENE	2010-06-21	summer
MOLENE	2010-07-21	summer
MOLENE	2010-08-04	summer
MOLENE	2010-08-19	summer
MOLENE	2010-09-01	fall
MOLENE	2010-09-15	fall
MOLENE	2010-10-04	fall
MOLENE	2010-11-02	fall
MOLENE	2010-11-15	fall
MOLENE	2011-02-14	winter
MOLENE	2011-02-25	winter
MOLENE	2011-03-14	spring
MOLENE	2011-03-28	spring
MOLENE	2011-06-29	summer
MOLENE	2011-07-13	summer
MOLENE	2011-07-26	summer
MOLENE	2011-08-07	summer
MOLENE	2011-08-24	summer
MOLENE	2011-09-08	fall
MOLENE	2011-10-06	fall
MOLENE	2011-11-04	fall
MOLENE	2011-11-21	fall
MOLENE	2011-12-19	winter
MOLENE	2012-01-05	winter
MOLENE	2012-02-03	winter
MOLENE	2012-02-16	winter
MOLENE	2012-02-29	winter
MOLENE	2012-03-16	spring
MOLENE	2012-04-02	spring
MOLENE	2012-05-16	spring
MOLENE	2012-05-31	spring
MOLENE	2012-06-13	summer
MOLENE	2012-06-27	summer
MOLENE	2012-07-12	summer
MOLENE	2012-08-28	summer
MOLENE	2012-09-11	fall
MOLENE	2012-09-26	fall
MOLENE	2012-10-12	fall
MOLENE	2012-11-07	fall
MOLENE	2012-11-21	fall
MOLENE	2012-12-06	winter
MOLENE	2012-12-21	winter
MOLENE	2013-01-08	winter
MOLENE	2013-01-22	winter
MOLENE	2013-02-04	winter
MOLENE	2013-04-19	spring
MOLENE	2013-05-07	spring
MOLENE	2013-06-04	summer
MOLENE	2013-07-04	summer
MOLENE	2013-07-17	summer
MOLENE	2013-07-31	summer
MOLENE	2013-08-14	summer
MOLENE	2013-08-30	summer
MOLENE	2013-09-13	fall
MOLENE	2013-09-27	fall
MOLENE	2013-11-28	fall
MOLENE	2013-12-10	winter
