# Supplementary material for: Long-term plankton and environmental monitoring dataset from the Marine Protected Area of the Iroise Marine Natural Park (2010–2023) in the Iroise Sea, North Atlantic
Source: Copernicus journal article supplement (doi:10.5194/essd-2025-207), 2025-04-28
Supplement: Supplementary file 2 [file essd-2025-207-supplement.zip]

# Long-term plankton and environmental monitoring dataset from the Marine Protected Area of the Iroise Marine Natural Park (2010-2023) in the Iroise Sea, North Atlantic.

Laetitia Drago<sup>1</sup>, Caroline Cailliau<sup>2</sup>, Patrick Pouline<sup>2</sup>, Beatriz Beker<sup>3</sup>, Laëtitia Jalabert<sup>4</sup>, Jean-Baptiste Romagnan<sup>5</sup>, Sakina-Dorothee Ayata<sup>1,6</sup>

<sup>1</sup>Sorbonne Université, MNHN, CNRS, IRD, Laboratoire d'Océanographie et du Climat : Expérimentations et Approches Numériques, LOCEAN, F-75005 Paris, France

<sup>2</sup>Parc naturel marin d'Iroise, Office Français de la Biodiversité, Le Conquet, France

<sup>3</sup>Laboratoire des Sciences de l'Environnement MARin (LEMAR), UMR 6539, Université de Bretagne Occidentale, Plouzané, France

<sup>4</sup>Sorbonne Université, CNRS, Institut de la Mer de Villefranche, IMEV, F-06230, Villefranche-sur-Mer, France

<sup>5</sup>DECOD, L'Institut Agro, IFREMER, INRAE, 44000, Nantes, France

<sup>6</sup>Institut Universitaire de France, F-75005 Paris, France

Correspondence to: Laetitia Drago ([laetitia.drago@locean.ipsl.fr](mailto:laetitia.drago@locean.ipsl.fr)) and Sakina-Dorothee Ayata ([sakina-dorothee.ayata@locean.ipsl.fr](mailto:sakina-dorothee.ayata@locean.ipsl.fr))

**Supplementary Table 1: Time coverage of the available zooplankton data.** Colored colors signify that there was a sampling done this month. Green signifies that the classification was checked a second time by Laëtitia Jalabert. The first sheet called “Transect sampling plan” contains the sampling plan for the transects B and D. The second sheet called “Coastal stations sampling plan” contains the sampling plan for the stations Douarnenez (D1), Molene and Sein. See document Supplementary\_Table\_1.xlsx

**Supplementary Table 2: Time coverage of the available biological and environmental data**

| Data type     | Zone       | Time coverage                 |
|---------------|------------|-------------------------------|
| Phytoplankton | Douarnenez | January 2013 - December 2018  |
|               | Sein       | April 2012 - November 2020    |
|               | Molène     | May 2011 - November 2017      |
|               | Transects  | October 2010 - September 2020 |
| Zooplankton   | Douarnenez | 2011, 2013-2021               |
|               | Molène     | 2011 - 2013                   |

|                                                                                    |           |                      |
|------------------------------------------------------------------------------------|-----------|----------------------|
|                                                                                    | Transects | 2010 - 2022          |
| Environmental (surface and bottom temperature and salinity)                        |           | 2010-2013, 2015-2023 |
| Environmental (profiles of temperature, salinity, turbidity, oxygen, fluorescence) |           | 2016, 2018-2023      |

25 **Supplementary Table 3: Names and associated ID number of all the Ecotaxa projects**

| Ecotaxa ID | Name of the project                           |
|------------|-----------------------------------------------|
| 436        | Zooscan AMP pnmir WP2 200 2010                |
| 434        | Zooscan AMP WP2 200 2013 2015 sn001           |
| 435        | Zooscan AMP WP2 200 2013 2015 sn033           |
| 442        | Zooscan AMP WP2 200 2010 2011                 |
| 443        | Zooscan AMP WP2 200 2011 2012                 |
| 468        | Zooscan AMP pnmir WP2 200 2011 2012 2013 2014 |
| 826        | Zooscan AMP pnmir WP2 200 2016                |
| 1140       | Zooscan AMP Douarnenez WP2 200 2015 2016 2017 |
| 1244       | Zooscan AMP pnmir WP2 200 2017                |
| 3847       | Zooscan AMP pnmir WP2 200 2018                |
| 3848       | Zooscan AMP pnmir WP2 200 2019                |
| 3849       | Zooscan AMP pnmir WP2 200 2020                |
| 5759       | Zooscan AMP pnmir WP2 200 2021                |
| 6448       | Zooscan AMP pnmir WP2 200 2022                |
| 8055       | Zooscan AMP Douarnenez WP2 200 2011           |
| 9297       | Zooscan AMP Douarnenez WP2 200 2021           |
| 9318       | Zooscan AMP Douarnenez WP2 200 2018 2019 2020 |
| 11128      | Zooscan AMP pnmir WP2 200 2023                |
